# Supplementary material for: Glycerylphytate as an ionic crosslinker for 3D printing of multi-layered scaffolds with improved shape fidelity and biological features
Source: Royal Society of Chemistry journal article supplement (doi:10.1039/c9bm01271k), 2019-11-05
Supplement: c9bm01271k1.pdf [file c9bm01271k1.pdf]

## **Glycerylphytate as ionic crosslinker for 3D printing of multi-layered scaffolds with improved shape fidelity and biological features**

*Ana Mora-Boza<sup>1, 2</sup>, Małgorzata K. Włodarczyk-Biegun<sup>3</sup>, Aránzazu del Campo<sup>3, 4</sup>, Blanca Vázquez-Lasa<sup>1, 2,\*</sup>, Julio San Román<sup>1, 2</sup>*

<sup>1</sup> Institute of Polymer Science and Technology, ICTP-CSIC. Juan de la Cierva 3, 28006

Madrid, Spain

<sup>2</sup> CIBER-BBN. Health Institute Carlos III, C/ Monforte de Lemos 3-5, Pabellón 11, 28029

Madrid, Spain

<sup>3</sup> INM – Leibniz Institute for New Materials, Campus D2 2, 66123 Saarbrücken,

Germany

<sup>4</sup> Chemistry Department, Saarland University, 66123 Saarbrücken, Germany

**Supplementary Information**

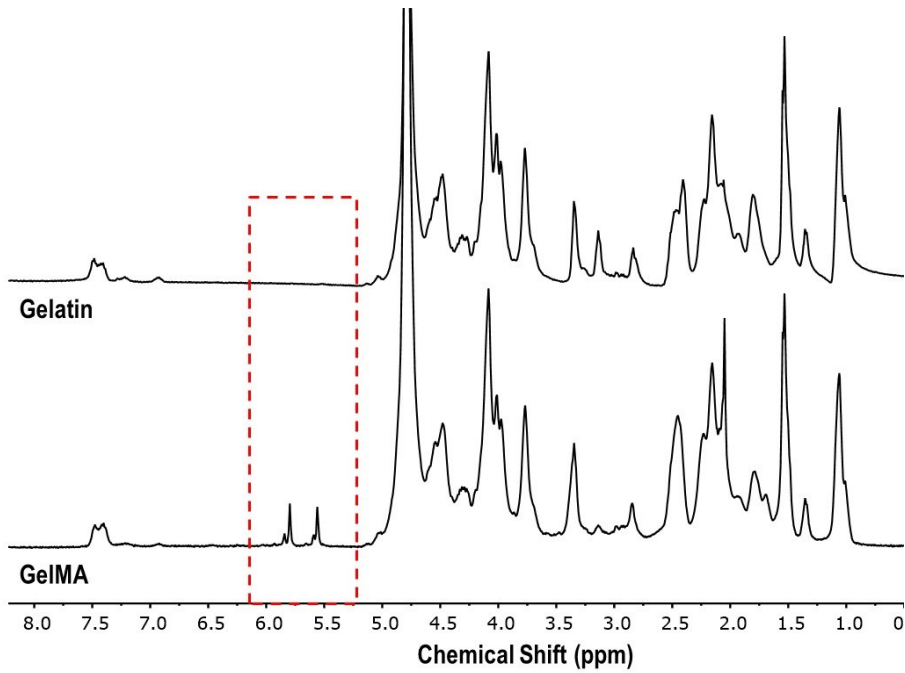

**Figure S1.**  $^1\text{H}$ -RMN spectra of gelatin and GelMA recorded in  $\text{D}_2\text{O}$  at  $37^\circ\text{C}$ . Degree of methacrylation was calculated taking into consideration the methacrylate signals that appeared at a chemical shift of 5.8 and 5.6 ppm, which were normalized against the aromatic signals of phenylalanine at 7.4 ppm <sup>1</sup>.

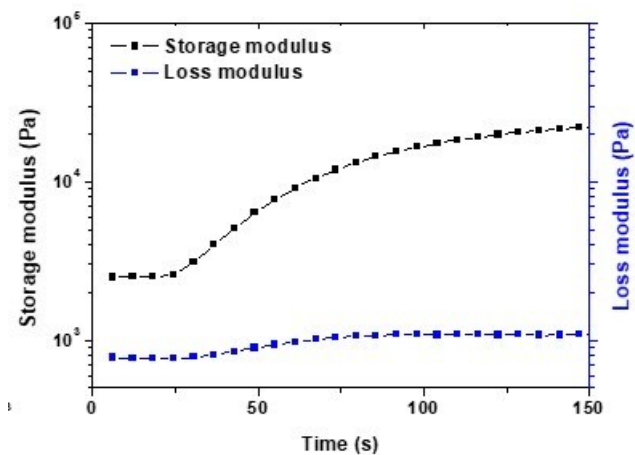

**Figure S2.** *In situ* photoinitiated crosslinking of the gel followed by rheology. The curves show the changes in the storage (black squares) and loss (blue squares) moduli of the gel during light exposure.

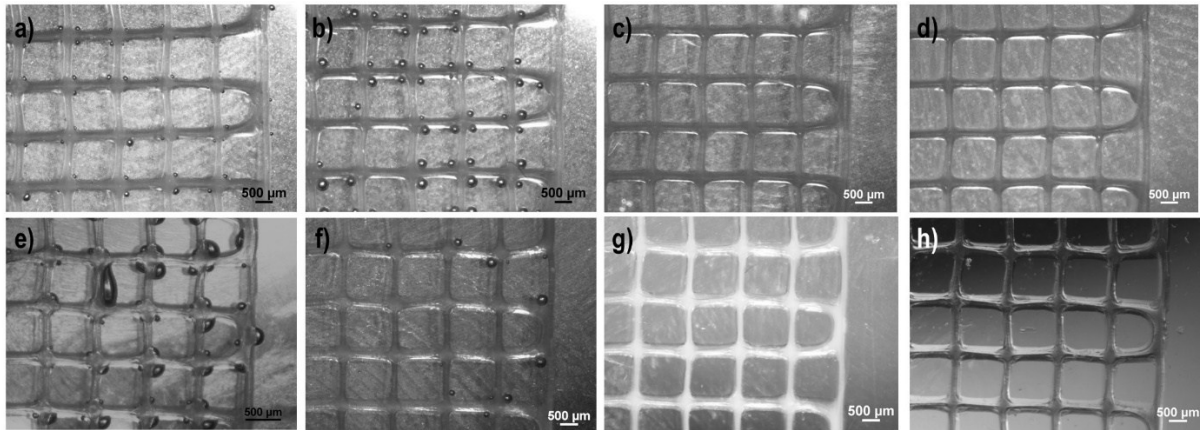

**Figure S3.** Qualitative examination under light microscopy of swelling for  $G_1Phy$  (a-d) and TPP (e-h) printed scaffolds at different times of incubation in PBS at 37 °C (2, 4, 7 and 10 days).

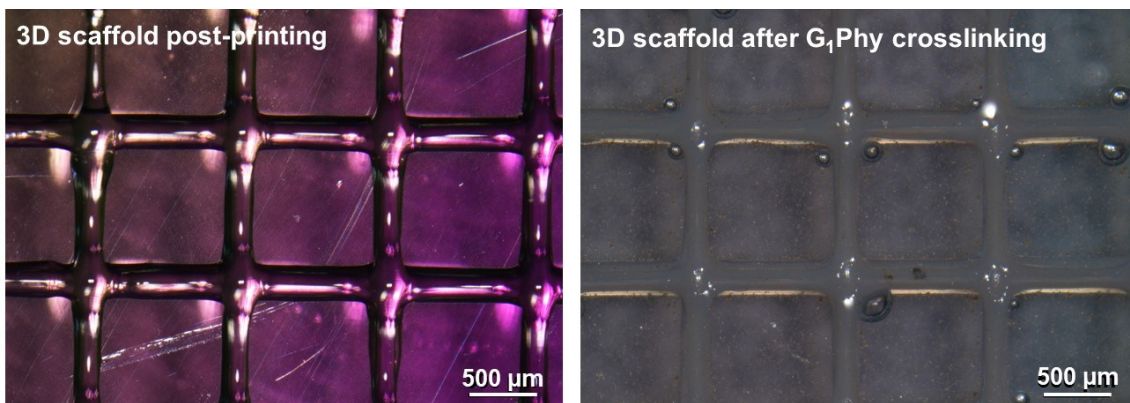

**Figure S4.** Light microscope images of a 3D printed scaffold after printing-photopolymerization process, and after ionic crosslinking with  $G_1Phy$

## References

1. M. Bartnikowski, R. Wellard, M. Woodruff and T. Klein, *Polymers*, 2015, **7**, 1539.
